# Supplementary material for: One-step and large-scale synthesis of anatase TiO2 mesocrystals along [001] orientation with enhanced photocatalytic performance
Source: Royal Society of Chemistry journal article supplement (doi:10.1039/c3ce41505h), 2013-01-01
Supplement: c3ce41505h.pdf [file c3ce41505h.pdf]

# Supporting Information

## **One-step and large-scale synthesis of anatase TiO<sub>2</sub> mesocrystals along [001] orientation with enhanced photocatalytic performance**

**Xiayi Yao, Xiaoheng Liu,\* Tianyu Liu, Kun Wang, Lude Lu**

**Key Laboratory for Soft Chemistry and Functional Materials of Ministry Education,**

**Nanjing University of Science and Technology, Nanjing 210094, China**

\* Corresponding author: Tel.: +86-25-84315943; fax: +86-25-84315054.

E-mail address: [xhliu@mail.njust.edu.cn](mailto:xhliu@mail.njust.edu.cn) (Xiaoheng Liu)

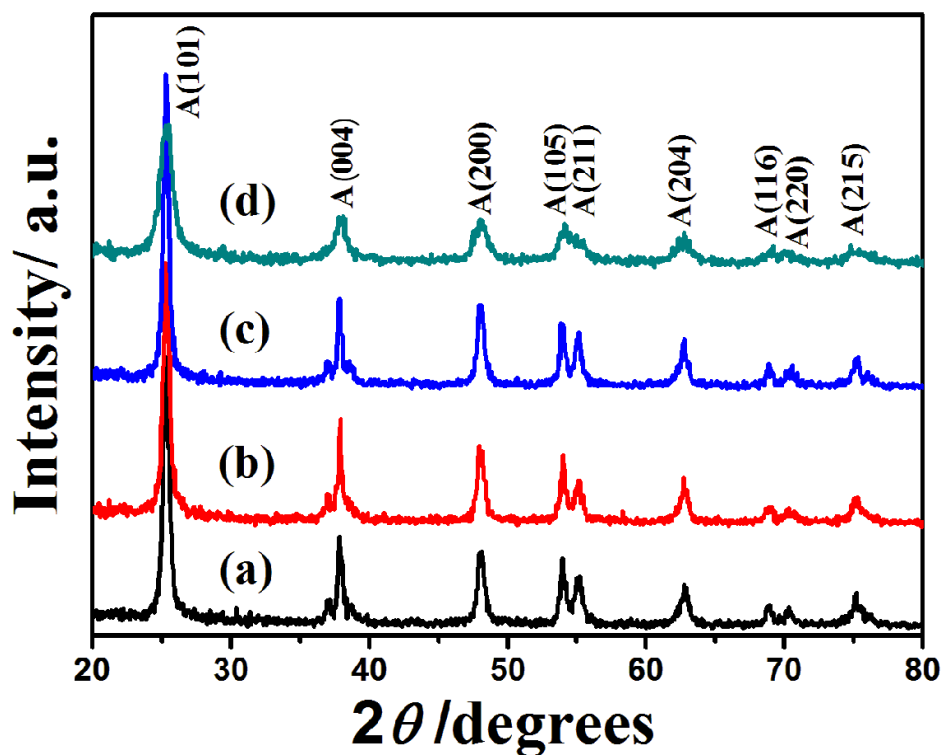

**Fig. S1** XRD patterns of the as-prepared TiO<sub>2</sub> samples with different TEOS and NaAc·3H<sub>2</sub>O amount: (a) 0.1 mL TEOS and 1.1022 g NaAc·3H<sub>2</sub>O; (b) 0.4 mL TEOS and 1.1022 g NaAc·3H<sub>2</sub>O; (c) 0.2 mL TEOS and 0.5511 g NaAc·3H<sub>2</sub>O; (d) 0.2 mL TEOS and 2.2044 g NaAc·3H<sub>2</sub>O.

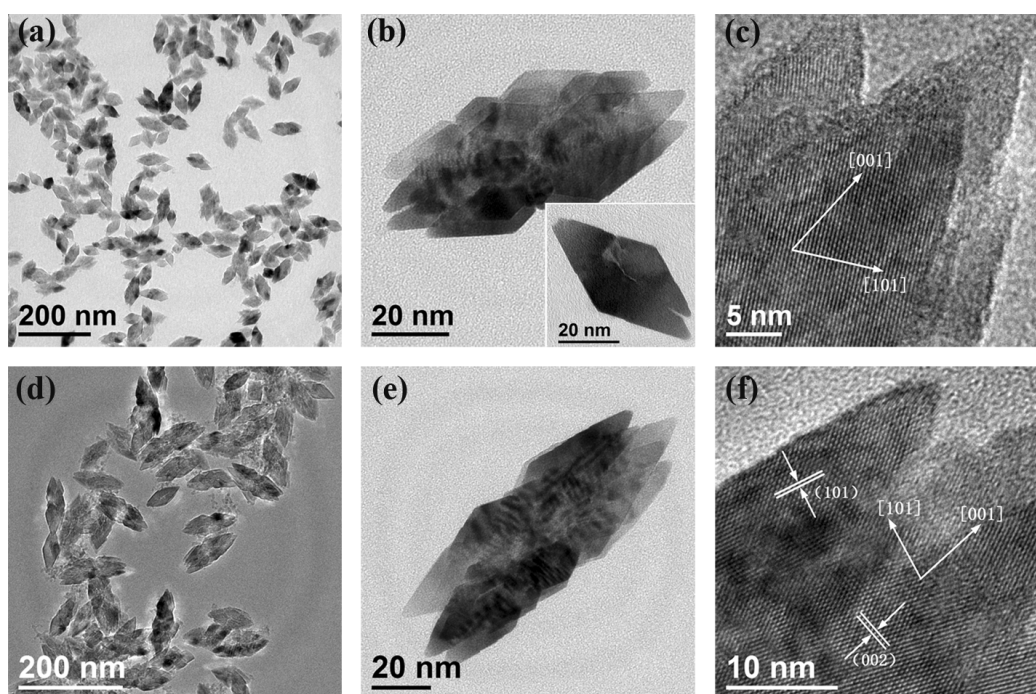

**Fig. S2** TEM images of the as-prepared TiO<sub>2</sub> samples with different TEOS amount: (a-c) 0.1 mL TEOS and 1.1022 g NaAc·3H<sub>2</sub>O; (d-f) 0.4 mL TEOS and 1.1022 g NaAc·3H<sub>2</sub>O; (b) inset: TEM image of rhombic-shaped TiO<sub>2</sub> nanocrystals.

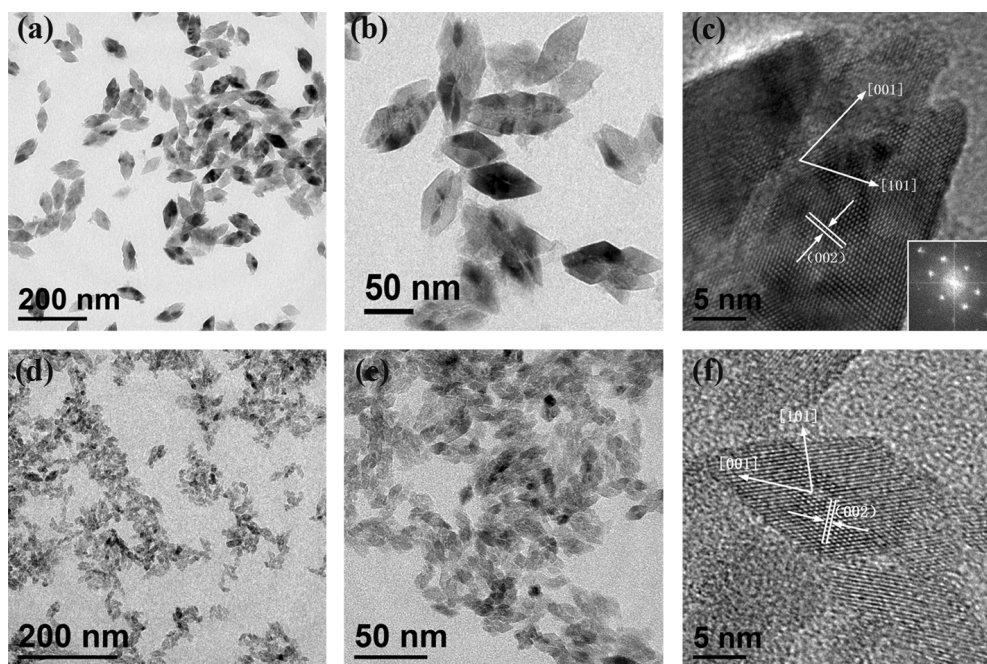

**Fig. S3** TEM images of the as-prepared TiO<sub>2</sub> samples with different NaAc·3H<sub>2</sub>O amount: (a-c) 0.2 mL TEOS and 0.5511 g NaAc·3H<sub>2</sub>O; (d-f) 0.2 mL TEOS and 2.2044 g NaAc·3H<sub>2</sub>O.

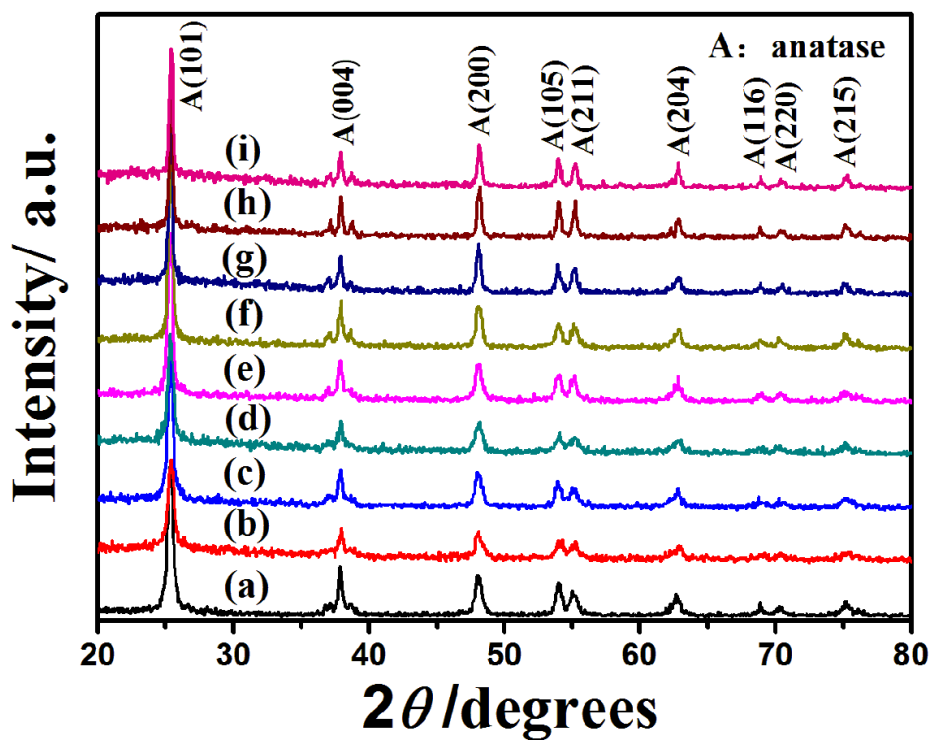

**Fig. S4** XRD patterns of anatase TiO<sub>2</sub> mesocrystals annealed in air at different temperature for 2h: (a) without annealing; (b) 300°C; (c) 400°C; (d) 500°C; (e) 600°C; (f) 700°C; (g) 800°C; (h) 900°C; (i) 1000°C

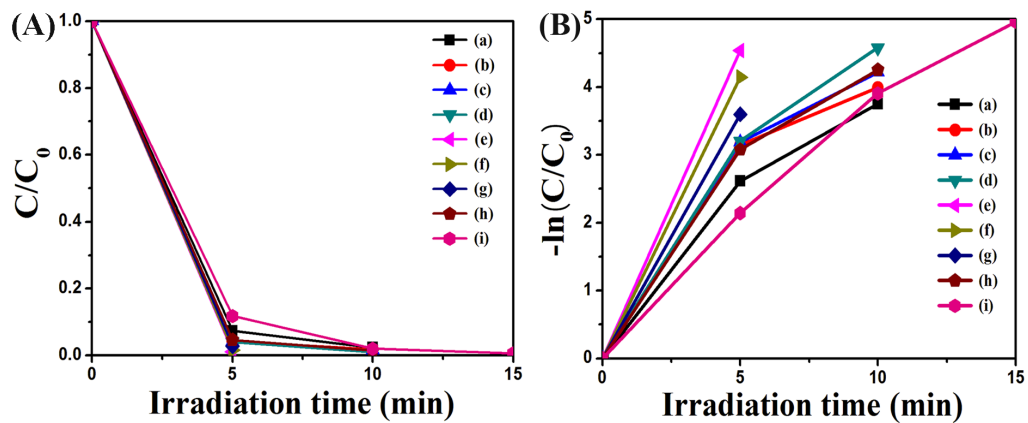

**Fig. S5** A: photocatalytic degradation of MB on anatase TiO<sub>2</sub> mesocrystals annealed in air at different temperature for 2h; B: the kinetic plots of MB photodegradation; C<sub>0</sub> and C are the initial MB concentration and concentration at irradiation time t (min), respectively. (a) anatase TiO<sub>2</sub> mesocrystals; (b) 300°C; (c) 400°C; (d) 500°C; (e) 600°C; (f) 700°C; (g) 800°C; (h) 900°C; (i) 1000°C
